# Supplementary material
Source: PubMed Central journal article supplement (PMC3867821)
Supplement: NIHMS525955-supplement-1.pdf [file NIHMS525955-supplement-1.pdf]

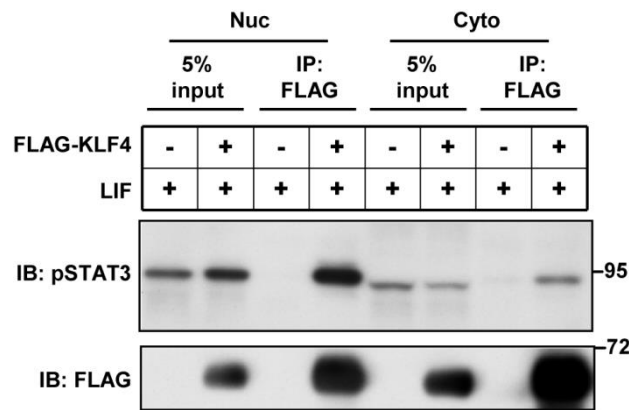

**Supplementary Figure S1** KLF4 binds to modified STAT3 in both the nucleus and cytoplasm. FLAG-tagged KLF4 was immunoprecipitated from either the nuclear or cytoplasmic fractions of LIF-treated COS7 cells. Endogenous phosphorylated STAT3 was examined by Western blotting. Nuc, nuclear extracts; Cyto, cytoplasmic extracts. Molecular size markers are in kDa.

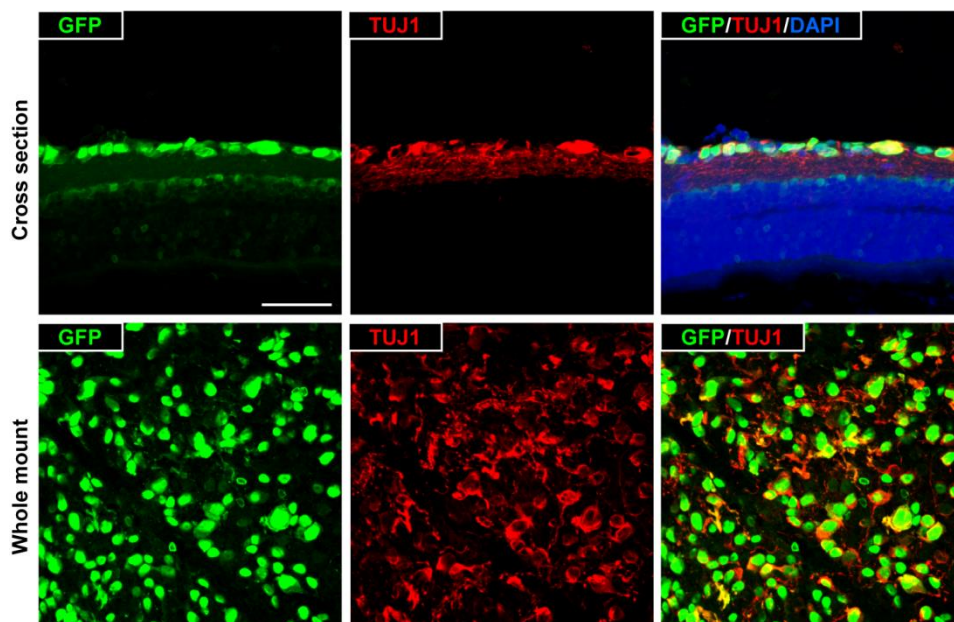

**Supplementary Figure S2** Targeting adult retinal ganglion cells by AAV. Adult mice were injected intravitreally with AAV2/9.hSynI.GFP-Cre, which expresses GFP and Cre fusion protein under the human synapsin I promoter. Confocal images of cross section or whole mount retinas are shown. RGCs were stained with an antibody against neuronal class III  $\beta$ -tubulin (TUJ1). Scale, 20  $\mu$ m.

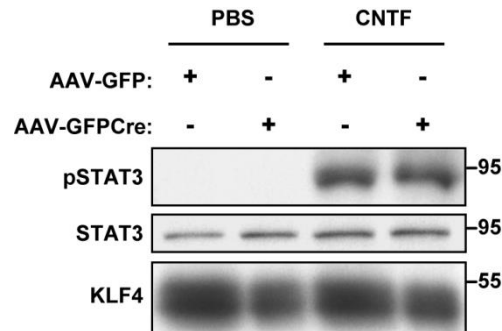

**Supplementary Figure S3** Deletion of KLF4 does not alter the endogenous expression of either total STAT3 or phospho-Y705-STAT3 (pSTAT3) in mouse retinas. Twelve days post intravitreal injection of AAV, CNTF or PBS was applied for 5 hrs before collecting the whole retina for western blot analysis. Molecular size markers are in kDa.

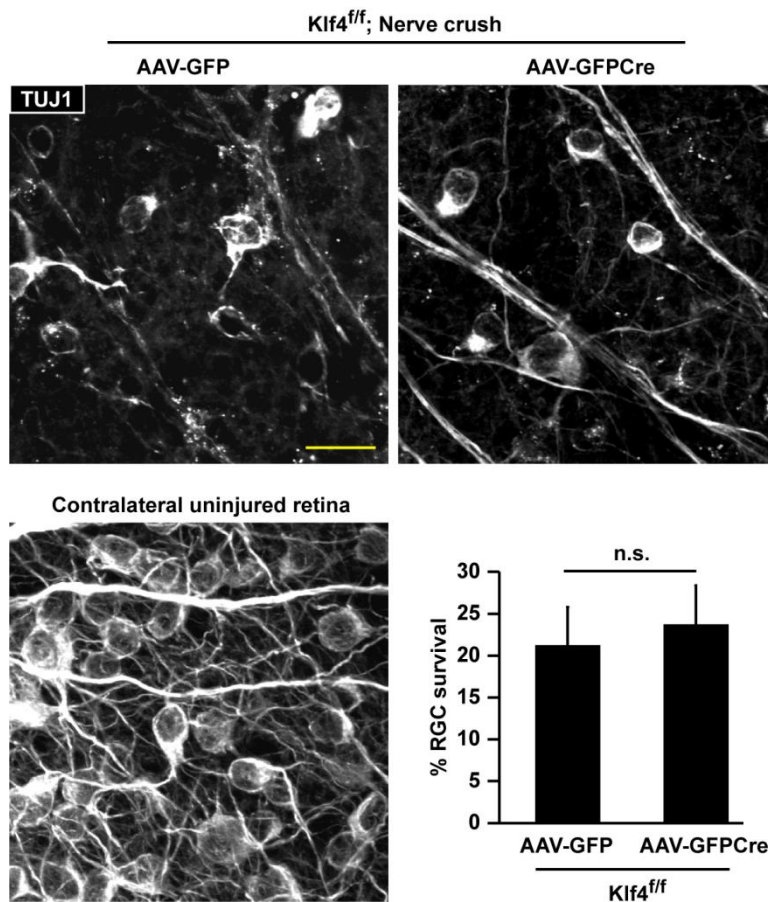

**Supplementary Figure S4** Acute deletion of KLF4 has no effect on RGC survival after nerve crush. Confocal images of TUJ1+ RGCs are shown. RGC survival was quantified by normalizing the number of TUJ1+ RGCs in the injured retina to that in the contralateral uninjured control retina within the same animal (means  $\pm$  s.e.m.; n = 5; n.s., not significant by Student's t-test). Scale, 20  $\mu$ m.

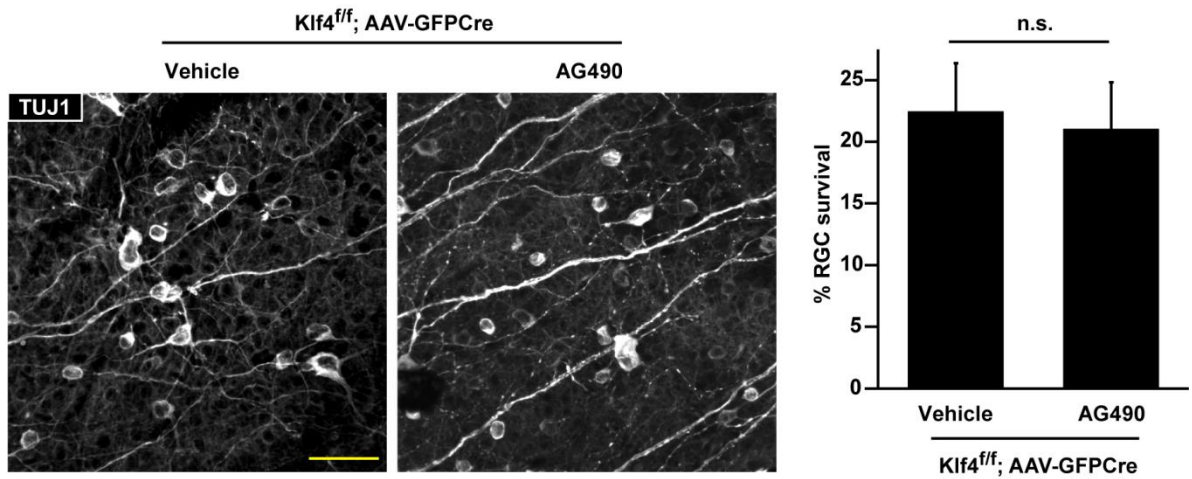

**Supplementary Figure S5** Treatment with AG490 has no significant effect on RGC survival after injury (means  $\pm$  s.e.m.;  $n = 3$ ; n.s., not significant by Student's t-test). Scale, 40  $\mu$ m.

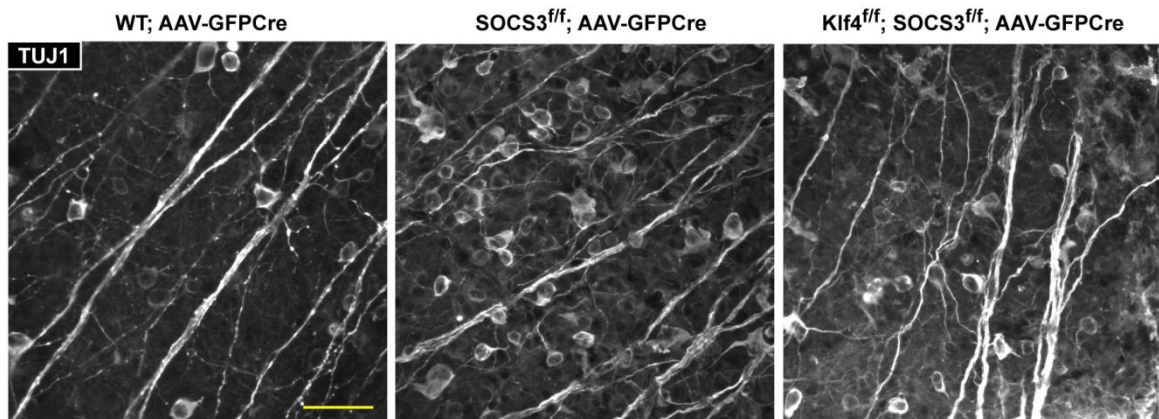

**Supplementary Figure S6** Removal of KLF4 expression has no added effect on survival of RGCs with SOCS3-deletion. Confocal images of TUJ1+ RGCs are shown. Scale, 40  $\mu$ m.

Fig. 1a

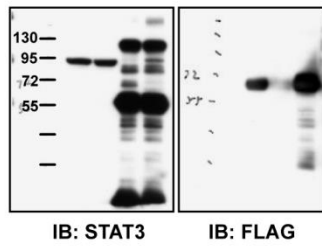

Fig. 1b

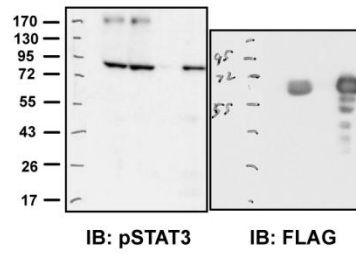

Fig. 1c

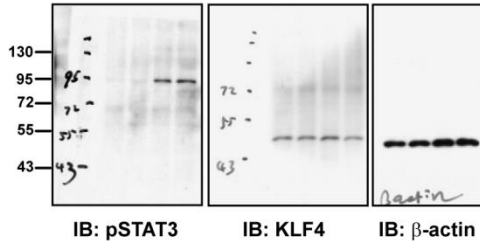

Fig. 1d

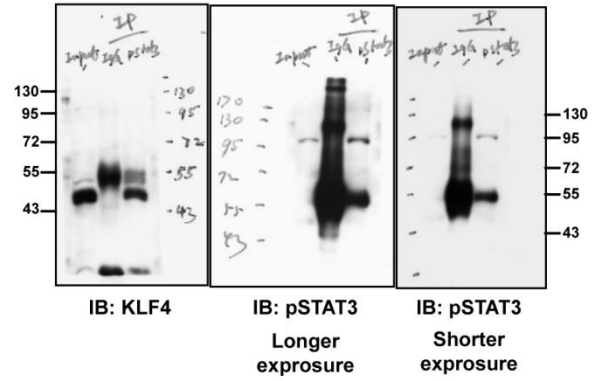

Fig. 1e

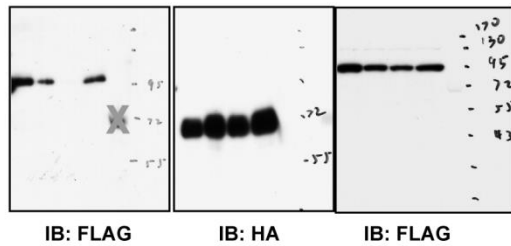

Fig. 1g

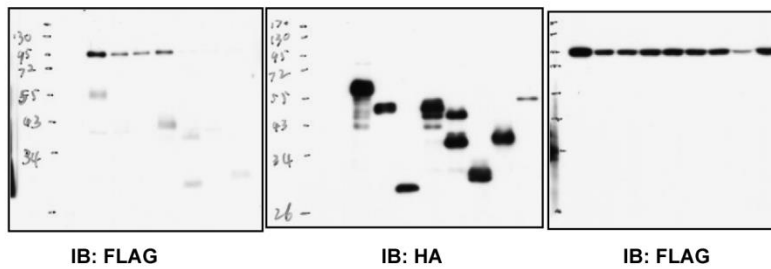

**Supplementary Figure S7** Full size scans of western blots presented in Figure 1. Molecular size markers are in kDa.

**Supplementary Figure S1**

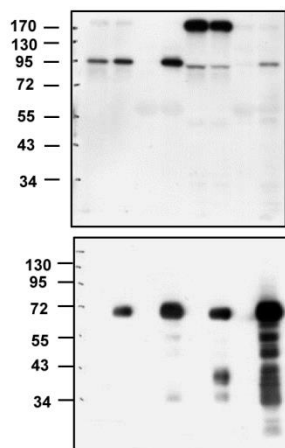

**Supplementary Figure S3**

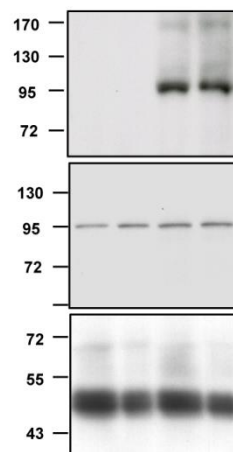

**Supplementary Figure S8** Full size scans of western blots presented in supplementary figures. Molecular size markers are in kDa.

**Supplementary Table S1** Primer sequences for qRT-PCR and ChIP experiments

| Items                    | Direction | Sequences                 |
|--------------------------|-----------|---------------------------|
| Sprr1a-stat3BS-chip (P1) | Forward   | TGTGTTTCCTGGAGGTGTTTC     |
|                          | Reverse   | GGTAGTCATAGGCAGCCACAGTCA  |
| Sprr1a-ex2-chip (P2)     | Forward   | GAGCCCTGCCAACCTAAG        |
|                          | Reverse   | CTCGGGAACAACAGGGTG        |
| Nrcam-stat3BS-chip (P1)  | Forward   | CATCACACTCACACGAAATC      |
|                          | Reverse   | GCCAGGAACTCAGGACTTG       |
| Nrcam-Ex31-chip (P2)     | Forward   | TCTGGTTGACTATGGAGAGGG     |
|                          | Reverse   | TTGCGTTGACAGGAGAAGG       |
| Elavl4                   | Forward   | CTCAGACTCCAGACCAAACC      |
|                          | Reverse   | TCTGCCTCAATCCTCTTATCAAAG  |
| Kcnb2                    | Forward   | GAAACTTTGGGACTTGCTGG      |
|                          | Reverse   | AACGATGAACAGGATAGACACG    |
| Nrcam                    | Forward   | TGGAAGGACTAGGGACAGAG      |
|                          | Reverse   | TCAGGTATGGGACAAAGGTTG     |
| Serpine2                 | Forward   | ATCTGAAGGAGCCACTGAAAG     |
|                          | Reverse   | TCGGATGGAAAACAGGAAAGG     |
| Sprr1a                   | Forward   | GAACCTGCTCTTCTCTGAGTATTAG |
|                          | Reverse   | AGGGATCCTTGGTTTTGGG       |
| Stmn2                    | Forward   | ACATCAACATCTACACCTACGAC   |
|                          | Reverse   | TCTCTGCCAACTGCTTCAG       |
| Ubxn2a                   | Forward   | CCCATTACCAGGATCCAGATC     |
|                          | Reverse   | CAATGTGAGCGTTTCATCCAG     |
| Gap43                    | Forward   | GAGAAGAACCAAACAGGTTGAAAAG |
|                          | Reverse   | TCGCAGCCTTATGAGCCTTATC    |
| Klf6                     | Forward   | ACTGTCTTTTCCAACCCGAC      |
|                          | Reverse   | AAGATAGCGTTCCAACCTCCAG    |
